# Supplementary material for: Hsp90 and Physiological Stress Are Linked to Autonomous Transposon Mobility and Heritable Genetic Change in Nematodes
Source: PubMed Central journal article supplement — Genome Biol Evol. 2016 Dec 24;8(12):3794–805. doi: 10.1093/gbe/evw284 (PMC5521727; doi:10.1093/gbe/evw284), 2016-12-24
Supplement: evw284_Supp.pdf [file evw284_Supp.pdf]

**Table S1. Primers used to detect transposon excision frequencies for two transposable elements from three loci in both *Caenorhabditis elegans* and *C. briggsae***

| Species           | Transposon                 | Locus              | Type        | Sequence                         |
|-------------------|----------------------------|--------------------|-------------|----------------------------------|
| <i>C.elegans</i>  | <i>CemaT1</i>              | F26H9              | Flanking    | GGGAAAGTCAATTTATTTTATTGCAACTAG   |
|                   |                            | F26H9              | Excised     | CGGAGCCTGGAGAAGTTTATAGAA         |
|                   |                            | F26H9              | Non-Excised | CCATAATTTTGACTCACCTGTAGAA        |
|                   | <i>CemaT1</i>              | W04G5              | Flanking    | GTTTGTCACTTTGTTATTCTGTTTTACGA    |
|                   |                            | W04G5              | Excised     | CACCGGTTGTTTTAAGATTATATACACA     |
|                   |                            | W04G5              | Non-Excised | CTTACCATAATTTTGACTCACCTGTATAC    |
|                   | <i>CemaT1</i>              | Y51A2D             | Flanking    | GGTACTGTAGGCTGGTGTTTGC           |
|                   |                            | Y51A2D             | Excised     | CTGTGTTTTAGTGTATAATTTCCGTCAA     |
|                   |                            | Y51A2D             | Non-Excised | TTACCATAATTTTGACTCACCTGTAAT      |
|                   | <i>Tc1</i>                 | T22F3              | Flanking    | ATGACTACTGTAGCGCTTGTATCGA        |
|                   |                            | T22F3              | Excised     | GATTATCAAAAATGGACAGCTATGTATATTCC |
|                   |                            | T22F3              | Non-Excised | ATCTTTTTGGCCAGCACTGTATATT        |
|                   | <i>Tc1</i>                 | Y94A7B             | Flanking    | TCCAAAACATCACTTATGTACATGCAA      |
|                   |                            | Y94A7B             | Excised     | GGAATGGCTAAACGTGAATATGG          |
|                   |                            | Y94A7B             | Non-Excised | GCCAGCACTGTACATGCAACA            |
|                   | <i>Tc1</i>                 | ZK1251             | Flanking    | CATCTCTAATTGTGCAGGTATGTATGC      |
|                   |                            | ZK1251             | Excised     | GCGTCTATTCTTATTTTTACTCTAATCAGTTG |
|                   |                            | ZK1251             | Non-Excised | TGGCCAGCACTGTATGCAAA             |
| <i>C.briggsae</i> | <i>CbmaT1</i> <sup>φ</sup> | CBRG21D19          | Flanking    | AAACTGATGTGTCAAAGTGGCCT          |
|                   |                            | CBRG21D19          | Excised     | GCCATCAATGTTTCATGATCTATGTATT     |
|                   |                            | CBRG21D19          | Non-Excised | TAATTTTGGCGGACCCTGTATT           |
|                   | <i>CbmaT1</i> <sup>φ</sup> | CB015K23           | Flanking    | CCATGTTTTGGGTCATTTTTCA           |
|                   |                            | CB015K23           | Excised     | GCTCTCGCTATCTCGCTACTACATAG       |
|                   |                            | CB015K23           | Non-Excised | TTTTGGCGGACCCTGTAGAT             |
|                   | <i>CbmaT1</i> <sup>φ</sup> | CB046A04           | Flanking    | CGTGGTCGTTTAAGAAAGTACGC          |
|                   |                            | CB046A04           | Excised     | AATGGCCTATAGAACGTCCTTTATGT       |
|                   |                            | CB046A04           | Non-Excised | TTGGCGGACCCTGTAAGC               |
|                   | <i>Tcb1</i>                | C009001188.Contig2 | Flanking    | CCTCTAGAAGTCCGTTTGACACATATC      |
|                   |                            | C009001188.Contig2 | Excised     | CCGCATCGCACACATATATGA            |
|                   |                            | C009001188.Contig2 | Non-Excised | CATTCTTTATGGCCAGTACTGTATGA       |
|                   | <i>Tcb1</i>                | C007801047.Contig1 | Flanking    | CTTGACTTAACATTTGTAAGACCGAAATT    |
|                   |                            | C007801047.Contig1 | Excised     | CAACGCGCATTGAACTTATAGATT         |
|                   |                            | C007801047.Contig1 | Non-Excised | GCATTCTTTATGGCCAGTACTGTAGAT      |
|                   | <i>Tcb1</i>                | C012001013.Contig3 | Flanking    | AACAGTTGACAAATTTTCAGTATCACAAG    |
|                   |                            | C012001013.Contig3 | Excised     | TTGGATATACCGTTTTTGAGATATACC      |
|                   |                            | C012001013.Contig3 | Non-Excised | GCATTCTTTATGGCCAGTACTGTACCT      |

<sup>φ</sup>For *CbmaT1* loci CBRG21D19, CB015K23, and CB046A04, previously referred to as G2D19, CB015K23, and c004200728.Contig1, respectively (Brownlie et al. 2005). Nomenclature for *Tcb1* follows that described by Brownlie et al. 2005.

**Table S2. Primers used to detect transposon insertion within the *unc-22* gene in *Caenorhabditis elegans* and *C. briggsae***

| Species                   | Name        | Forward                           | Reverse                            |
|---------------------------|-------------|-----------------------------------|------------------------------------|
| <b><i>C. elegans</i></b>  | Ce-unc22-1  | F1: ATGGGTCAAGACTTTGATTGCGA       | R1: CAAGTACAGTAAGCTGAGCATGAGTT     |
|                           | Ce-unc22-2  | F2: AACCGCCGATGAAGTACAGTTTCCT     | R2: TGAATTTTGGCTTAGCCAATT          |
|                           | Ce-unc22-3  | F3: TCCCGGCATGGTTGAAACACGAC       | R3: CTTCCGATTTTGGTTCTCTTCTCAAT     |
|                           | Ce-unc22-4  | F4: ATGGGAACCAGCCATCACTGTTTCTGGCG | R4: ATTGGTAAGTCTGACCTGGTTTCAA      |
|                           | Ce-unc22-5  | F5: TCCGTGTCAAGGCTTTGAACAAGGCT    | R5: AGCAGAGTTTTTGGTAATCTTTCCAA     |
|                           | Ce-unc22-6  | F6: GAGCTTACCTGGAATAGACCATTGAG    | R6:CGCCATCCAGGTAATTGTACAATGGTTGCGG |
|                           | Ce-unc22-7  | F7:AACCTGAATTCACAGTTGACAAACTCAGG  | R7:TGTTTCATCAACATCATATCCTCGCCTG    |
|                           | Ce-unc22-8  | F8: AGGAAAGATTGTACGTGGAAAAGGAACC  | R8: TCCCTTATCATCTCCCTTTACTCGGTT    |
|                           | Ce-unc22-9  | F9:GAATACACAGTCCGTGCAAAGAA        | R9: TTAGACAAGGAGAAGAGCTGCCGCA      |
| <b><i>C. briggsae</i></b> | Cb-unc22-1  | F1:ATGAACTACACGCCTGGATCGTA        | R1:AGCAGAATCGGTTCCGTGTGCAT         |
|                           | Cb-unc22-2  | F2:GATGTGAAGCTGTTGGTCACATCTG      | R2:ACAGCAATCTGGTTTGGTCTGG          |
|                           | Cb-unc22-3  | F3: GAATTGACAGACACGAAGGTTG        | R3: TACTGGAACATCGAATTCCACAT        |
|                           | Cb-unc22-4  | F4: CGTGGAGAACCACCACCGAAGAAG      | R4: GTTGGCTGTATCGTATTTTTCAATG      |
|                           | Cb-unc22-5  | F5: GGAAGATGGGTTCCAGCTGCTAAGG     | R5: CTTGACGCGGAATTTGTATTCGT        |
|                           | Cb-unc22-6  | F6: GCAGTCAACCGTCAAGGAACATCTG     | R6: CTTGATCCATCTTCCAGTCTTTGC       |
|                           | Cb-unc22-7  | F7: GTCAACACTTCACCAGTTCAAGG       | F7: TGTGAGTCCAGTGACACGGTGTT        |
|                           | Cb-unc22-8  | F8: CCAAAGAAGACCTACGAGTTCAG       | R8: AACAAATAGCTGGTGATCTTCGA        |
|                           | Cb-unc22-9  | F9: GAGAAAAGAGACTTATCAAAGG        | R9: CGGCGAGAGTCCGGATAGAAGA         |
|                           | Cb-unc22-10 | F10: TTTGGAGGAGAGAACGATGATGAC     | R10: TCATGCCTTAATGTCAAGCTTGAA      |

**Table S3. Effect sizes and standard errors for variables affecting TE excision frequency in *C. elegans*.**

|                          | Excision Frequency (Log Units)       |                                      |
|--------------------------|--------------------------------------|--------------------------------------|
|                          | <i>CemaT1</i>                        | <i>Tc1</i>                           |
| Intercept                | -5.04 <sup>***</sup> (0.09)          | -5.05 <sup>***</sup> (0.07)          |
| Hsp90-RNAi               | 0.68 <sup>***</sup> (0.12)           | 0.08 (0.08)                          |
| H2O2-Low                 | 0.59 <sup>***</sup> (0.12)           | 0.83 <sup>***</sup> (0.08)           |
| H2O2-High                | 1.42 <sup>***</sup> (0.12)           | 1.26 <sup>***</sup> (0.08)           |
| Heat-Low                 | 0.04 (0.12)                          | 0.04 (0.08)                          |
| Heat-Serial              | 0.88 <sup>***</sup> (0.12)           | 0.91 <sup>***</sup> (0.08)           |
| Heat-High                | 1.99 <sup>***</sup> (0.11)           | 1.85 <sup>***</sup> (0.08)           |
| Locus-W04G5              | 0.96 <sup>***</sup> (0.06)           |                                      |
| Locus-Y51A2D             | 1.13 <sup>***</sup> (0.06)           |                                      |
| Locus-Y94A7              |                                      | 1.38 <sup>***</sup> (0.04)           |
| Locus-K1251              |                                      | 1.42 <sup>***</sup> (0.04)           |
| Strain-AB2               |                                      | -0.23 <sup>***</sup> (0.03)          |
| Hsp90-RNAi x H2O2-Low    | 0.71 <sup>***</sup> (0.17)           | -0.08 (0.12)                         |
| Hsp90-RNAi x H2O2-High   | 0.67 <sup>***</sup> (0.17)           | 0.37 <sup>***</sup> (0.12)           |
| Hsp90-RNAi x Heat-Low    | 0.01 (0.17)                          | -0.03 (0.12)                         |
| Hsp90-RNAi x Heat-Serial | 2.03 <sup>***</sup> (0.17)           | 0.19 (0.12)                          |
| Hsp90-RNAi x Heat-High   | 1.05 <sup>***</sup> (0.16)           | 0.24 <sup>**</sup> (0.12)            |
| Observations             | 372                                  | 360                                  |
| R <sup>2</sup>           | 0.89                                 | 0.91                                 |
| F Statistic              | 229.55 <sup>***</sup> (df = 13; 358) | 247.01 <sup>***</sup> (df = 14; 345) |

Estimated effects (and standard errors) are in log units relative to No Stress controls, in the absence of Hsp90-RNAi treatment, in the N2 strain, for F26H9 (*CemaT1*) or K1251 (*Tc1*) loci. Asterisks represent *P*-values, with *P* < 0.1 (\*), *P* < 0.05 (\*\*), and *P* < 0.01 (\*\*\*). Only variables that were significant were included in each final model.

**Table S4. Effect sizes and standard errors for variables affecting TE excision frequency in *C. briggsae*.**

|                          | Excision Frequency (Log Units)       |                                      |
|--------------------------|--------------------------------------|--------------------------------------|
|                          | <i>CbmaT1</i>                        | <i>Tcb1</i>                          |
| Intercept                | -2.75 <sup>***</sup> (0.08)          | -1.31 <sup>***</sup> (0.09)          |
| Hsp90-RNAi               | 0.10 (0.09)                          | 0.09 (0.11)                          |
| H2O2-Low                 | 0.49 <sup>***</sup> (0.09)           | 0.55 <sup>***</sup> (0.11)           |
| H2O2-High                | 1.27 <sup>***</sup> (0.09)           | 1.11 <sup>***</sup> (0.11)           |
| Heat-Low                 | -0.09 (0.09)                         | -0.08 (0.11)                         |
| Heat-Serial              | 0.99 <sup>***</sup> (0.09)           | 0.56 <sup>***</sup> (0.11)           |
| Heat-High                | 1.72 <sup>***</sup> (0.09)           | 1.17 <sup>***</sup> (0.11)           |
| Locus-CB015K23           | 0.16 <sup>**</sup> (0.07)            |                                      |
| Locus-CB046A04           | -1.55 <sup>***</sup> (0.07)          |                                      |
| Locus-C007801047         |                                      | -0.81 <sup>***</sup> (0.08)          |
| Locus-C012001013         |                                      | -2.29 <sup>***</sup> (0.08)          |
| Strain-DH1300            | 0.94 <sup>***</sup> (0.07)           | 0.06 (0.08)                          |
| Hsp90-RNAi x H2O2-Low    | 0.24 <sup>*</sup> (0.13)             | -0.02 (0.16)                         |
| Hsp90-RNAi x H2O2-High   | 0.59 <sup>***</sup> (0.13)           | 0.33 <sup>**</sup> (0.16)            |
| Hsp90-RNAi x Heat-Low    | -0.08 (0.13)                         | -0.01 (0.16)                         |
| Hsp90-RNAi x Heat-Serial | 0.15 (0.13)                          | 0.22 (0.16)                          |
| Hsp90-RNAi x Heat-High   | 0.35 <sup>***</sup> (0.13)           | 0.38 <sup>**</sup> (0.16)            |
| CB015K23 x DH1300        | -2.00 <sup>***</sup> (0.09)          |                                      |
| CB046A04 x DH1300        | 0.001 (0.09)                         |                                      |
| C007801047 x DH1300      |                                      | 0.46 <sup>***</sup> (0.11)           |
| C012001013 x DH1300      |                                      | -0.46 <sup>***</sup> (0.11)          |
| Observations             | 289                                  | 288                                  |
| R <sup>2</sup>           | 0.93                                 | 0.91                                 |
| F Statistic              | 210.26 <sup>***</sup> (df = 16; 272) | 180.64 <sup>***</sup> (df = 16; 271) |

Estimated effects (and standard errors) are in log units relative to No Stress controls, in the absence of Hsp90-RNAi treatment, in the AF16 strain, for CBRG21D19 (*CbmaT1*) or C009001188 (*Tc1*) loci. Asterisks represent *P*-values, with *P* < 0.1 (\*), *P* < 0.05 (\*\*), and *P* < 0.01 (\*\*\*). Only variables that were significant were included in each final model.

**Table S5. Incidence rates and standard errors for variables affecting *unc-22* mutation frequency.**

|                          | Incidence rate of plates with <i>unc-22</i> mutants |                                  |
|--------------------------|-----------------------------------------------------|----------------------------------|
|                          | <i>C. elegans</i>                                   | <i>C. briggsae</i>               |
| Intercept                | 0.08 <sup>***</sup> (0.06-0.12)                     | 0.05 <sup>***</sup> (0.37-0.78)  |
| Hsp90-RNAi               | 1.16 (0.67-2.00)                                    | 0.90 (0.54-1.53)                 |
| H2O2-Low                 | 1.57 (0.89-2.77)                                    | 1.97 <sup>***</sup> (1.24-3.15)  |
| H2O2-High                | 4.31 <sup>***</sup> (2.66-7.16)                     | 8.97 <sup>***</sup> (6.05-13.67) |
| Heat-Low                 | 1.00 (0.57-1.76)                                    | 1.31 (0.81-2.12)                 |
| Heat-Serial              | 2.66 <sup>***</sup> (1.59-4.52)                     | 2.78 <sup>***</sup> (1.81-4.39)  |
| Heat-High                | 5.08 <sup>***</sup> (3.16-8.38)                     | 6.87 <sup>***</sup> (4.58-10.57) |
| Strain-DH1300            |                                                     | 1.38 <sup>***</sup> (1.20-1.59)  |
| Hsp90-RNAi x H2O2-Low    | 2.18 <sup>*</sup> (1.04-4.60)                       | 2.95 <sup>***</sup> (1.57-5.58)  |
| Hsp90-RNAi x H2O2-High   | 4.56 <sup>***</sup> (2.33-8.90)                     | 2.55 <sup>***</sup> (1.41-4.61)  |
| Hsp90-RNAi x Heat-Low    | 1.00 (0.46-2.16)                                    | 1.26 (0.64-2.49)                 |
| Hsp90-RNAi x Heat-Serial | 3.15 <sup>***</sup> (1.58-6.30)                     | 3.64 <sup>***</sup> (1.98-6.72)  |
| Hsp90-RNAi x Heat-High   | 3.24 <sup>***</sup> (1.66-6.34)                     | 3.69 <sup>***</sup> (2.03-6.72)  |
| Observations             | 36                                                  | 72                               |

Incidence rate is provided as exponentiated output of general linear regression with quasibinomial family, and values are for all loci relative to No Stress controls, in the absence of Hsp90-RNAi treatment. For *C. briggsae* values are relative to AF16 strain, whereas only one strain was examined in *C. elegans*. Only variables that were significant were included in each final model.

**Table S6. Hsp90 (*daf-21*) mRNA transcript levels for two strains of *Caenorhabditis elegans* and two strains of *C. briggsae* following experimental exposure to environmental stress. Values presented are mean  $\pm$  standard error for five biological replicates for each strain and treatment and are derived from qRT-PCR. All treatments resulted in higher ( $P < 0.05$ ) Hsp90 mRNA levels relative to 'No Stress' control animals.**

| Treatment:    | <i>C. elegans</i> |                 | <i>C. briggsae</i> |                 |
|---------------|-------------------|-----------------|--------------------|-----------------|
|               | N2                | AB2             | AF16               | DH1300          |
| No Stress     | 1.00 $\pm$ 0.06   | 1.00 $\pm$ 0.05 | 1.00 $\pm$ 0.07    | 1.00 $\pm$ 0.08 |
| Heat - Low    | 2.21 $\pm$ 0.09   | 2.16 $\pm$ 0.11 | 2.18 $\pm$ 0.12    | 2.04 $\pm$ 0.13 |
| Heat - Serial | 2.15 $\pm$ 0.11   | 2.23 $\pm$ 0.16 | 1.99 $\pm$ 0.15    | 2.19 $\pm$ 0.12 |
| Heat - High   | 2.22 $\pm$ 0.07   | 2.21 $\pm$ 0.07 | 2.22 $\pm$ 0.16    | 2.15 $\pm$ 0.14 |
| H2O2 -Low     | 1.97 $\pm$ 0.11   | 2.18 $\pm$ 0.17 | 2.22 $\pm$ 0.13    | 1.98 $\pm$ 0.09 |
| H2O2 - High   | 2.18 $\pm$ 0.12   | 1.94 $\pm$ 0.08 | 1.99 $\pm$ 0.14    | 2.21 $\pm$ 0.08 |

**Table S7. Hsp90 (*daf-21*) mRNA transcript knockdown for two strains of *Caenorhabditis elegans* and two strains of *C. briggsae* following *daf-21*-dsRNA exposure through bacterial feeding, and subsequent exposure to environmental stress. Transcript knockdown levels for all treatments are relative to 'No dsRNA' control animals (zero knockdown), which were fed with bacteria that lacked the *daf-21* hairpin expression cassette. All treatments analyzed resulted in significant ( $P < 0.05$ ) knockdown of Hsp90 mRNA levels. A value of 1.00 reflects complete knockdown; all values represent three independent replicate experiments of pools of 20 worms.**

| Treatment:  | <i>C. elegans</i> |             | <i>C. briggsae</i> |             |
|-------------|-------------------|-------------|--------------------|-------------|
|             | N2                | AB2         | AF16               | DH1300      |
| No Stress   | 0.90 ± 0.08       | 0.89 ± 0.07 | 0.87 ± 0.05        | 0.90 ± 0.05 |
| Heat - Low  | 0.91 ± 0.04       | 0.88 ± 0.13 | 0.86 ± 0.10        | 0.90 ± 0.07 |
| Heat - High | 0.84 ± 0.13       | 0.79 ± 0.14 | 0.74 ± 0.12        | 0.82 ± 0.17 |
| H2O2 - High | 0.76 ± 0.13       | 0.80 ± 0.15 | 0.83 ± 0.09        | 0.86 ± 0.12 |

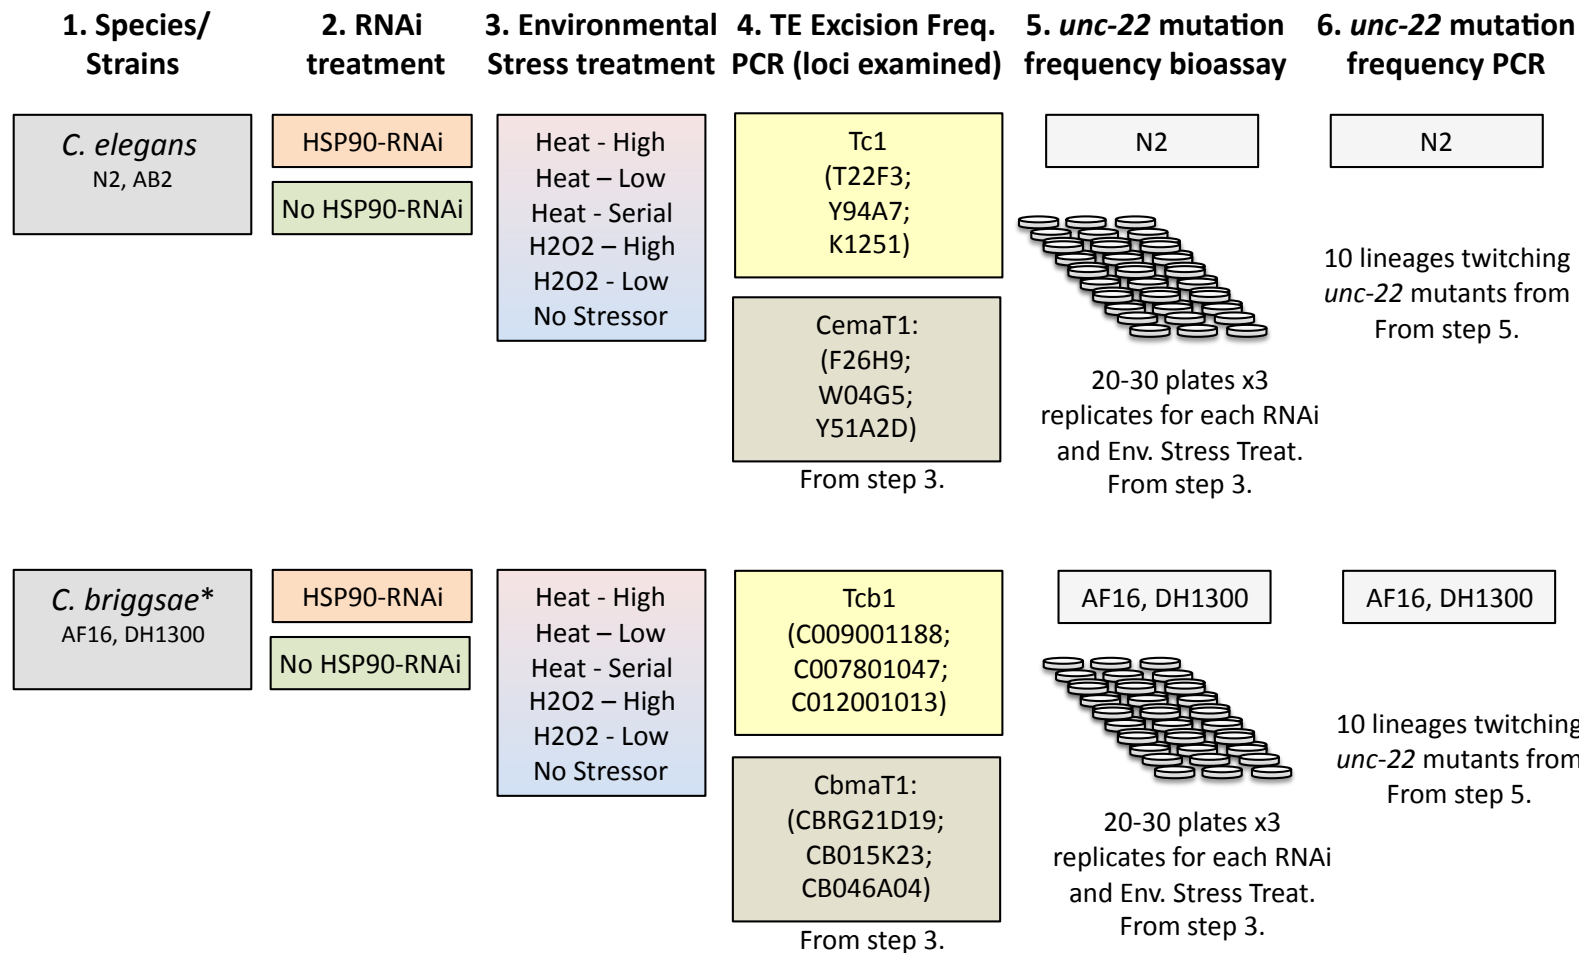

\*Transgenic *C. briggsae* strains were generated to express the *Cel-sid-2* gene

**Figure S1.** Experimental design for testing stress-induced transposon excision, insertion, and phenotypic effects in two species of nematode (*Caenorhabditis elegans* and *C. briggsae*) (step 1). Two strains of both species were exposed to double-stranded RNA which either silences the Hsp90 (*daf-21*) gene, or acts as a control (step 2). All worms were then exposed (step 3) to different environmental stressors, and TE excision frequency was then measured for three loci each (step 4). Mutation frequency was measured by both bioassay (step 5) or reporter (*unc-22*) gene frequency as measured by PCR (step 6)



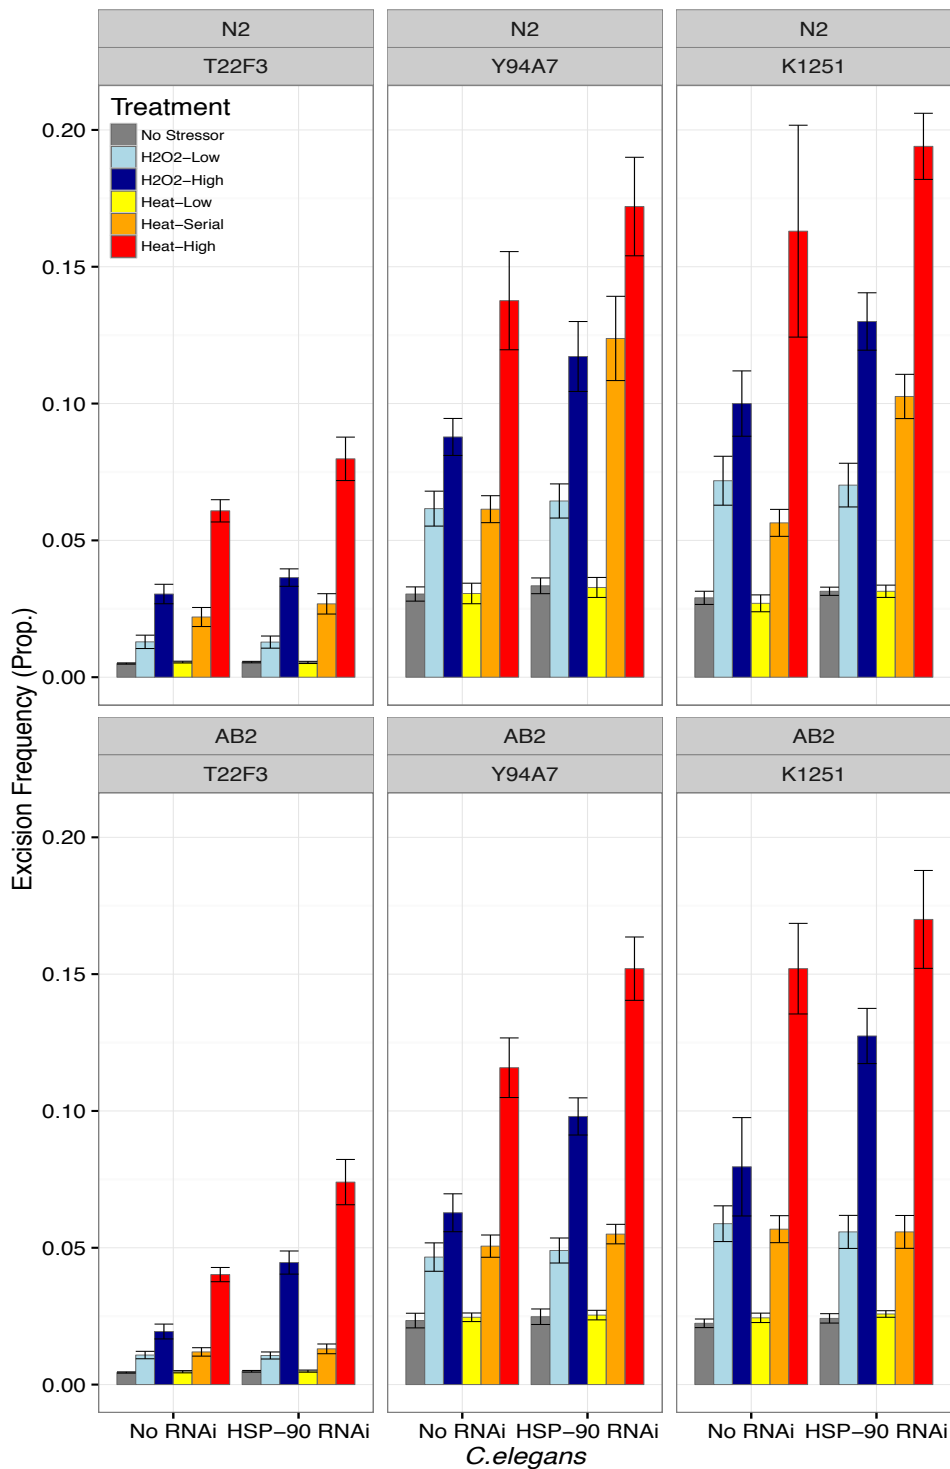

**Figure S2.** Excision frequency for *Tc1* transposons at three loci (K1251, T22F3, Y94A7) for two strains of *C. elegans* (N2, AB2) in response to five different conditions of environmental stress, plus no stress controls. Excision frequency given as the proportion of excision footprints to the number of non-excised transposons at a given locus. Oxidative stress treatments are shown in light (Low-H2O2) and dark (High-H2O2) blue, while heat stress is indicated by yellow (Low; 35°C for 1 h), orange (Serial; five serial exposures of 35°C for 1 h, 30 min at 20°C) and red (High; 39°C for 2 h). Gray indicates controls with no stress treatment.

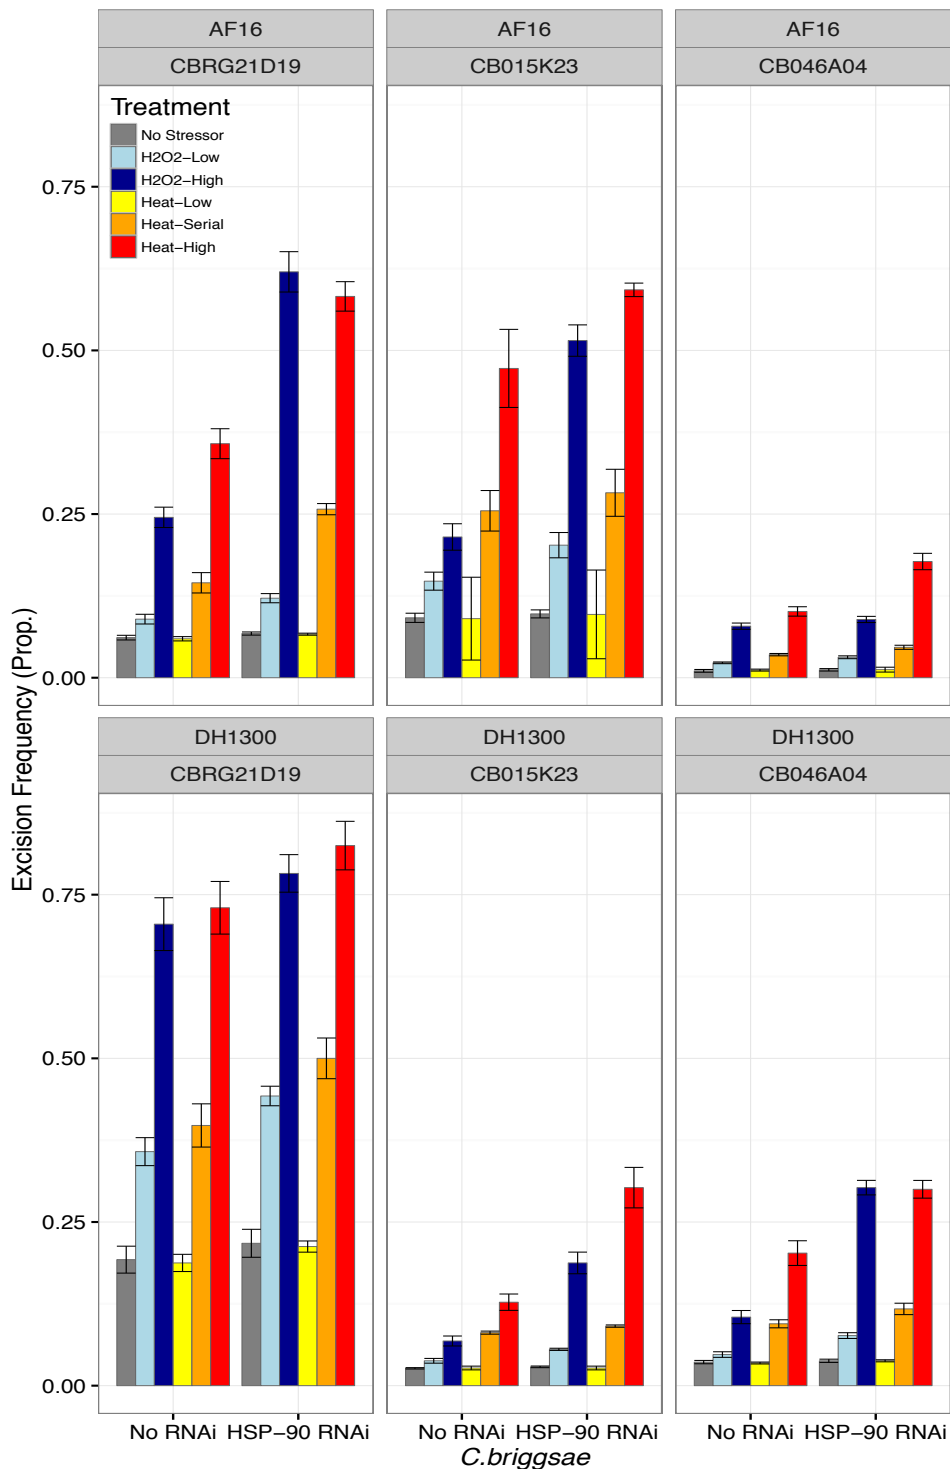

**Figure S3.** Excision frequency for *CbmaT1* transposons at three loci (CBRG21D19, CB015K23, CB046A04) for two strains of *C. briggsae* (AF16, DH1300) in response to five different conditions of environmental stress, plus no stress controls. Excision frequency given as the proportion of excision footprints to the number of non-excised transposons at a given locus. Oxidative stress treatments are shown in light (Low-H2O2) and dark (High-H2O2) blue, while heat stress is indicated by yellow (Low; 35°C for 1 h), orange (Serial; five serial exposures of 35°C for 1 h, 30 min at 20°C) and red (High; 39°C for 2 h). Gray indicates controls with no stress treatment. CBRG21D19, CB015K23, and CB046A04 previously referred to as G2D19, CB015K23, and c004200728.Contig1, respectively (Brownlie et al. 2005).

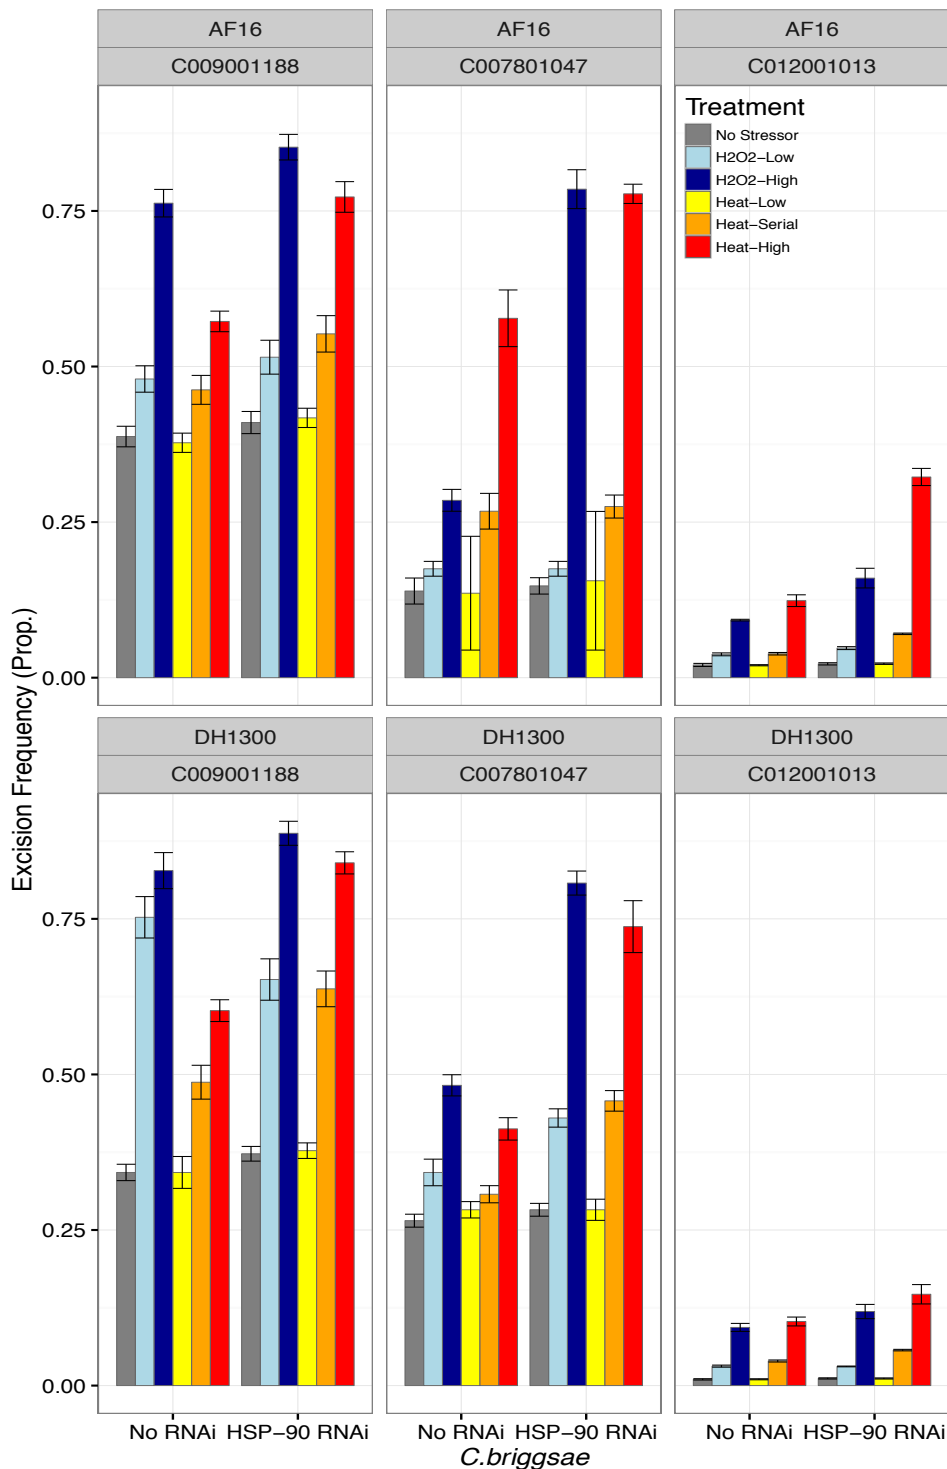

**Figure S4.** Excision frequency for *Tcb1* transposons at three loci (C009001188, C007801047, C012001013) for two strains of *C. briggsae* (AF16, DH1300) in response to five different conditions of environmental stress, plus no stress controls. Excision frequency given as the proportion of excision footprints to the number of non-excised transposons at a given locus. Oxidative stress treatments are shown in light (Low-H2O2) and dark (High-H2O2) blue, while heat stress is indicated by yellow (Low; 35°C for 1 h), orange (Serial; five serial exposures of 35°C for 1 h, 30 min at 20°C) and red (High; 39°C for 2 h). Gray indicates controls with no stress treatment. The complete names for C009001188, C007801047, and C012001013 are C009001188.Contig2, C007801047.Contig1, and c012001013.Contig3 (Brownlie et al. 2005).
